# Supplementary material for: Silk Fibroin-Coated Liposomes as Biomimetic Nanocarrier for Long-Term Release Delivery System in Cancer Therapy
Source: MDPI journal article supplement (doi:10.3390/molecules26164936), 2021-08-15
Supplement: s1 [file s1]

# Silk Fibroin Coated Liposomes as Biomimetic Nanocarrier for Long-term Release Delivery System in Cancer Therapy

Chanon Suyamud <sup>1,3</sup>, Chanita Phetdee <sup>2,3</sup>, Thanapak Jaimalai <sup>3</sup> and Panchika Prangkio <sup>3,4\*</sup>

<sup>1</sup> Master's Degree Program in Chemistry, Faculty of Science, Chiang Mai University, Chiang Mai 50200, Thailand; chanon\_suy@cmu.ac.th

<sup>2</sup> Doctor of Philosophy Program in Chemistry, Faculty of Science, Chiang Mai University, Chiang Mai 50200, Thailand; chanita\_phet@cmu.ac.th

<sup>3</sup> Department of Chemistry, Faculty of Science, Chiang Mai University, Chiang Mai 50200, Thailand; thanapak.nj@gmail.com (T.J.); panchika.p@cmu.ac.th (P.P.)

<sup>4</sup> Center of Excellence in Materials Science and Technology, Faculty of Science, Chiang Mai University, Chiang Mai 50200, Thailand

\* Correspondence: panchika.p@cmu.ac.th; Tel.: +66-053-943-341

**Table S1.** Physicochemical properties of SF-LPs with and without methanol addition during SF coating

| Sample                       | Size (nm)     | PDI           |
|------------------------------|---------------|---------------|
| Uncoated LPS                 | 136.24 ± 0.52 | 0.108 ± 0.000 |
| SF-LPS, 0.5% SF              | 150.97 ± 0.57 | 0.214 ± 0.001 |
| SF-LPS, 0.5% SF without MeOH | 258.40 ± 5.60 | 0.216 ± 0.014 |
| SF-LPS, 1.0% SF              | 136.24 ± 2.30 | 0.220 ± 0.004 |
| SF-LPS, 1.0% SF without MeOH | 225.21 ± 27.9 | 0.496 ± 0.096 |
| SF-LPS, 2.0% SF              | 148.55 ± 2.13 | 0.222 ± 0.016 |
| SF-LPS, 2.0% SF without MeOH | 343.25 ± 45.5 | 0.738 ± 0.046 |

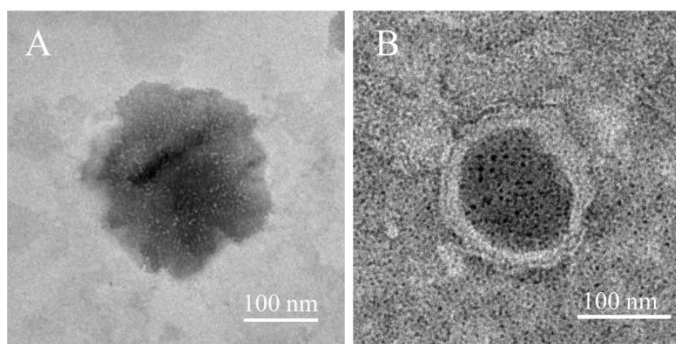

**Figure S.1** Representative TEM images of SF-LPs (1% SF). **(A)** SF-LPs without stearylamine (SA) **(B)** SF-LPs containing SA on the surface before coating using SF at 1%. In the presence of SA, SF-LPs showed the relatively smooth surface compared to SF-LPs without SA.
